# Crowdsourcing neuroscience: inter-brain coupling during face-to-face interactions outside the laboratory

Suzanne Dikker <sup>\*,†,1,2</sup>, Georgios Michalareas <sup>†,3</sup>, Matthias Oostrik, Amalia Serafimaki <sup>4</sup>, Hasibe Melda Kahraman <sup>2</sup>, Marijn E. Struiksma <sup>1</sup>, David Poeppel <sup>2,3</sup>

<sup>1</sup> Department of Language and Communication, Utrecht University, 3512 JK Utrecht, The Netherlands.

<sup>2</sup> Department of Psychology, New York University, New York, NY 10003, USA.

<sup>3</sup> Max Planck Institute for Empirical Aesthetics, 60322 Frankfurt am Main, Germany.

<sup>4</sup> The American College of Greece, Gravias Street GR-153 42 Aghia Paraskevi Athens, Greece

\*Correspondence to [sdikker@gmail.com](mailto:sdikker@gmail.com)

†These authors contributed equally to this work.

**Author contributions** SD and MO designed the research; AS and MS led data collection; GM, SD, and HK performed data analysis; SD, GM, HK and DP wrote the paper.

## **Keywords**

Hyperscanning, real-world neuroscience, inter-brain coupling, brain-to-brain synchronization, oscillations

**Acknowledgements** This research was supported by the Netherlands Organization for Scientific Research Award 275-89-018. The Mutual Wave Machine was made possible with support by Creative Industries Fund NL, TodaysArt, Marina Abramovic Institute, de Hersenstichting, Lowlands Science, Utrecht University, and NEON.

**Design, tech & production:** Peter Burr, Danielle Boelling, Diederik Schoorl, Jean Jacques Warmerdam, Matthew Patterson Curry, Pandelis Diamantides; **Data collection and management:** Annita Apostolaki, Dana Bevilacqua, Shaista Dhanesar, Imke Kruitwagen, Eletta Daemen, Orsa Rebouskou, Stella Papazisi, Aspa Papazisi, Karlijn Blommers, Sascha Couvee, Ella Bosch, Jorik Geutjes, Chris van Run.

## ABSTRACT

When we feel connected or engaged during social behavior, are our brains in fact “in sync” in a formal, quantifiable sense? Most studies addressing this question use highly controlled tasks with homogenous subject pools. In an effort to take a more naturalistic approach, we collaborated with art institutions to crowd-source neuroscience data: Over the course of 5 years, we collected electroencephalogram (EEG) data from thousands of museum and festival visitors who volunteered to engage in a 10-minute face-to-face interaction. Pairs of participants with various levels of familiarity sat inside the Mutual Wave Machine—an artistic Brain-Computer Interface (BCI) installation that translates real-time correlations of each pair’s EEG activity into light patterns. Because such inter-participant EEG correlations are prone to noise contamination, in subsequent offline analyses we computed inter-brain synchrony using Imaginary Coherence and Projected Power Correlations, two synchrony metrics that are largely immune to instantaneous, noise-driven correlations. When applying these methods to two subsets of recorded data with the most consistent protocols, we found that pairs’ trait empathy, social closeness, engagement, and social behavior (joint action and eye contact) consistently predicted the extent to which their brain activity became synchronized, most prominently in low alpha power (~7-10 Hz) and beta oscillations (~20-22 Hz). These findings support an account where shared engagement and joint action drive coupled neural activity and behavior during dynamic, naturalistic social interactions. To our knowledge, this work constitutes a first demonstration that an interdisciplinary, real-world, crowd-sourcing neuroscience approach may provide a promising method to collect large, rich datasets pertaining to real-life face-to-face interactions. Additionally, this work is a demonstration of how the general public can participate and engage in the scientific process outside of the laboratory. Institutions such as museums, galleries, or any other organization where the public actively engages out of self-motivation, can help facilitate this type of “citizen science” research, and support the collection of large datasets under scientifically controlled experimental conditions. To further enhance the public interest for this type of out-of-the-lab experimental approach, the data and results of this study are disseminated through a website tailored to the general public ([wp.nyu.edu/mutualwavemachine](http://wp.nyu.edu/mutualwavemachine))

# INTRODUCTION

Laboratory research is widely assumed to provide foundational insights into how our brains process information on an everyday basis. However, this model has not been systematically tested: we rarely, if ever, conduct our research in real-world, everyday contexts (Matusz, Dikker, Huth, & Perrodin, 2019; Shamay-Tsoory & Mendelsohn, 2019). At the same time, an increasing number of studies emphasize the importance of face-to-face social interaction to our physical and mental wellbeing (e.g., Kross et al., 2013). For example, eye contact has long been recognized as a vital aspect of healthy cognition and cognitive development (e.g., Tomasello & Others, 1995), by highlighting cues that allow people to coordinate social behavior (Sebanz, Bekkering, & Knoblich, 2006). To arrive at a more comprehensive understanding of the brain basis of social interaction, then, measuring communication ‘live’ is vital: realistic human interactions are more complex and more richly coupled across participants/brains than can be captured in canonical laboratory experiments.

Here, we aimed to identify neural correlates of real-world face-to-face social interactions in a large population of participants recruited outside of the traditional research subject pool (typically university undergraduate students). The homogeneity of scientific study participants is increasingly considered problematic with respect to the generalizability of research findings (Falk et al., 2013; Henrich, Heine, & Norenzayan, 2010; LeWinn, Sheridan, Keyes, Hamilton, & McLaughlin, 2017). One option is to make more of an effort to bring participants from the general public to the laboratory; another possible solution is to bring the laboratory to the public. In this work, we provide a methodological proof of concept for the second model: we show that it is feasible to conduct large-scale neuroscience research ‘in the wild’ while maintaining rigor in terms of both analysis and interpretation.

We capitalized on recent real-world social neuroscience research (Dikker et al., 2017; Bevilacqua et al., 2019; Bhattacharya, 2017; Dikker, Montgomery, & Tunca, 2019; Matusz, Dikker, Huth, & Perrodin, 2019; Parada & Rossi, 2017), mobile electroencephalography (EEG) technology (Debener, Minow, Emkes, Gandras, & de Vos, 2012; Gwin, Gramann, & Makeig, 2010), brain-computer-interfaces (Brunner et al., 2015; Minguillon, Lopez-Gordo, & Pelayo, 2017), and the so-called “interactive turn” in social neuroscience (De Jaegher, Di Paolo, & Gallagher, 2010). In recent years, there has been a surge of studies that compare brain activity *between* participants instead of using a stimulus-brain approach (e.g., Dumas, Nadel, Soussignan, Martinerie, & Garnero, 2010; Hasson, Nir, Levy, Fuhrmann, & Malach, 2004; for reviews see e.g., Babiloni & Astolfi, 2014; Hasson, Ghazanfar, Galantucci, Garrod, & Keysers, 2012; Liu et al., 2018; Sängner, Lindenberger, & Müller, 2011). Concretely, we used a ‘crowdsourcing neuroscience’ approach in which, over the course of five years, museum and festival visitors were invited to participate in research as part of their audience experience. We identified a set of characteristics that were deemed socially relevant (social closeness, social behavior, mental states, and personality traits) and asked whether these attributes affected inter-brain synchrony between two people during naturalistic face-to-face interaction. Crucially, we not only sought to identify such factors, but also whether they can be dissociated at the neural level, specifically with respect to different characteristics of brain oscillations. Our experimental question was made tangible and enticing to the audience as follows: “When are your brainwaves literally “on the same wavelength”?”

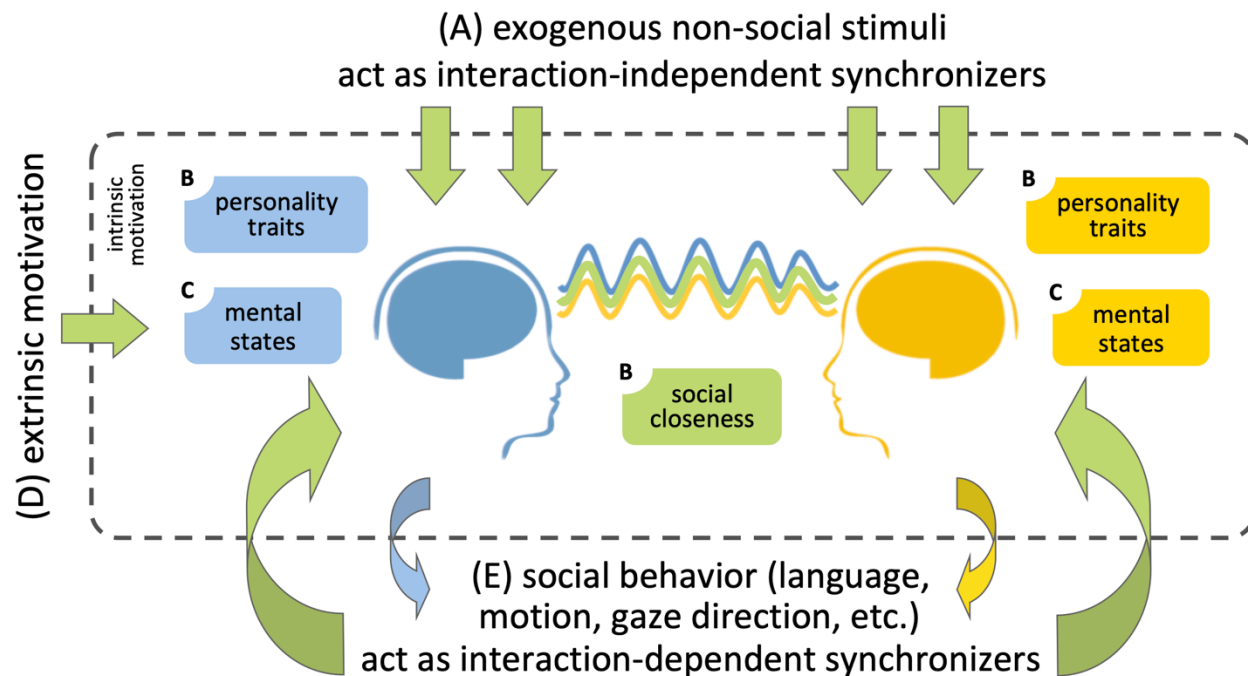

**Figure 1. Different possible sources of inter-brain synchrony**

(A) External non-social stimuli (top) and (E) social behavior (bottom) provide exogenous sources of shared stimulus entrainment and interpersonal social coordination, respectively, leading to similar brain responses, i.e., inter-brain synchrony. (B) Both individuals' social closeness and personality traits (e.g., affective empathy) are expected to affect their social engagement during the interaction, and thus the extent to which their brain responses become synchronized. (C) participants' mental states (e.g., focus) are similarly expected to affect participants' engagement with each other, intrinsically (endogenously) motivate participants to make an effort to connect to each other. (D) Such engagement can be "boosted" via extrinsic motivation, which should subsequently lead to increased inter-brain synchrony.

Recent research has identified a number of predictors of inter-brain synchrony (e.g., Astolfi et al., 2010; Bevilacqua et al., 2018; Dikker, Silbert, Hasson, & Zevin, 2014; Dikker et al., 2017; Hasson et al., 2004; Konvalinka et al., 2014; Nummenmaa et al., 2012; Parkinson, Kleinbaum, & Wheatley, 2018; Pérez, Dumas, Karadag, & Duñabeitia, 2018; Stephens, Silbert, & Hasson, 2010). Figure 1 illustrates the factors under investigation here.

First, brain activity becomes synchronized between people when they listen to or watch the same stimulus (Figure 1a). Stimulus-induced synchrony, however, need not have social sources. In the analysis described below, we removed any instantaneous co-variations in pairs' brain recordings before further analysis, with the rationale that this would allow us to evaluate whether social and interpersonal factors can explain inter-brain synchrony above and beyond stimulus-elicited entrainment: "Social" factors (Figure 1b-e) arguably involve high-level inferences and should correlate with induced brain activity in higher brain areas, remote from the stimulus-evoked responses of sensory cortex, which are more time-locked to the stimulus and thus also between participants. This rationale is supported by recent work in fMRI showing that meaningful inter-brain correlations operate at different timescales in high vs. low-level brain areas, which raises the possibility to use different synchrony metrics as tools to distinguish the inter-subject convergence of low vs. high-level representations, where socially-relevant representations are arguably a subcategory of the latter.

Socially-induced behavioral synchrony (Figure 1e) is prevalent throughout our everyday interactions: consider pedestrians navigating sidewalk traffic, conversations, a tango dance, a musical duet. Face-to-face interactions require tight spatio-temporal coordination between their participants at cognitive (Pickering & Garrod, 2013), perceptual (Kang & Wheatley, 2017), and motoric levels (Richardson, Dale, & Tomlinson, 2009). Such interpersonal rhythmic coordination occurs spontaneously (Richardson, Marsh, Isenhower, Goodman, & Schmidt, 2007) and is subject to individual differences: people with a prosocial orientation tend to synchronize more (Lumsden, Miles, Richardson, Smith, & Macrae, 2012), and children with Autism Spectrum Disorder do not engage in spontaneous rhythmic movement synchronization with others (Marsh et al., 2013). Perhaps most importantly, synchronized joint action is

predictive of how the interaction is experienced. For example, therapists and patients who exhibit more synchronized motion during a therapy session, report higher therapeutic satisfaction (Koole & Tschacher, 2016; Ramseyer & Tschacher, 2011). Synchronous biological rhythms have also been linked to social behavior in a meaningful way, ranging from heart rate and respiration (Müller & Lindenberger, 2011; Noy, Levit-Binun, & Golland, 2015; Thorson, West, & Mendes, 2018; Waters, West, Karnilowicz, & Mendes, 2017), to brain responses: For example, synchronous resting state fMRI activity between children and their caregivers is predictive of their relationship (Lee, Miernicki, & Telzer, 2017), and friends show more similar neural responses to video clips (Parkinson et al., 2018).

We expected both participants' social personality traits (e.g., affective empathy) and pairs' social closeness to affect their mutual social engagement, and thus the extent to which their brain responses become synchronized. Past research has already demonstrated that interpersonal factors affect inter-brain synchrony. For example, collaborative attitudes lead to higher inter-brain synchrony than competitive behavior (Cui, Bryant, & Reiss, 2012) as do social closeness and empathic personality (e.g., Bevilacqua et al., 2019; Dikker et al., 2017; Goldstein, Weissman-Fogel, Dumas, & Shamay-Tsoory, 2018; Kinreich, Djalovski, Kraus, Louzoun, & Feldman, 2017).

Mental states such as engagement/focus level (Figure 1c) have also been shown to affect inter-brain synchrony (Bevilacqua et al., 2019; Dalton et al., 2005; Dikker et al., 2017; Dumas, Chavez, Nadel, & Martinerie, 2012; Goldstein et al., 2018; Kylliäinen et al., 2012; Petroni et al., 2017; Scott-Van Zeeland, Dapretto, Ghahremani, Poldrack, & Bookheimer, 2010). Such engagement can arguably be “boosted” via extrinsic motivation (Figure 1d), which should subsequently lead to increased inter-brain synchrony.

We manipulated extrinsic motivation using the Mutual Wave Machine (Dikker, Montgomery & Tunca, 2019), a dome-like BCI/neurofeedback environment that immerses participants in a real-time audio-visual (AV) reflection of the extent to which their EEG signals are instantaneously correlated in one or more frequency bands (Figure 2). We hypothesized that this would motivate participants to remain socially engaged with each other for the duration of the interaction (Figure 1d). To test this, we asked whether explicitly informing participants that the audio-visual (A/V) environment reflected their ongoing correlated EEG signal resulted in a “self-fulfilling prophecy” of sorts: If you think you are receiving real-time audio-visual feedback about how in sync you are with your partner, will that actually positively affect your ongoing inter-brain synchrony?

As detailed in the Methods, it is important to note that ‘brain synchrony’ as reflected in the Mutual Wave Machine is likely very prone to noise contamination, rendering it difficult to draw meaningful conclusions about participants’ veridical brain synchrony based on their real-time A/V environment. Participants were explicitly informed of this limitation and were told that a subsequent offline scientific analysis would be applied to their data. A second limitation is that the real-time brain synchrony involved the computation of instantaneous correlations between narrow-band versions of short portions of the EEG recorded signals. As a result, high correlation values due to chance are more likely than when broadband signal correlations are used (see Methods for a more detailed description).

To circumvent these issues, we used two different metrics to compute non-instantaneous inter-brain synchrony: *projected power correlations* and *imaginary coherence*. While imaginary coherence provides a quantitative characterization of whether oscillations within specific frequency ranges show consistent phase relationships between pairs of participants; projected



power correlations quantify the extent to which power in a specific frequency co-fluctuates between pairs. Second, as explained in detail in the Methods, projected power correlations and imaginary coherence are especially suited for noisy recording environments, such as museums (Cruz-Garza et al., 2017), because the common signal between individual recordings (or: instantaneous co-fluctuations) is removed before computing brain synchrony. In other words, any electrical noise or sensory cortex activity driven by strong audio-visual input can only minimally affect the estimated brain synchrony. This is especially important in the current setup because participants were surrounded by electronic equipment and strong audio-visual stimulation originating from the art exhibition. We additionally circumvented spurious effects of environmental noise on brain synchrony by adopting a strict brain-behavior correlational analysis approach.

To summarize, in this study, pairs of participants interacted semi-naturally while seated facing each other, allowing us to investigate how the extent to which brain activity becomes synchronized between dyads during face-to-face social interaction relates to participants' (a) relationship (relationship duration and social closeness; Aron, Aron, & Smollan, 1992), (b) affective personality traits (Personal Distress and Perspective Taking; Davis & Others, 1980), (c) mental states (positive affect, negative affect, and focus; (Watson & Clark, 1994), and (d) motivation (real-team audio-visual brain synchrony feedback; Dikker, Montgomery, & Tunca, 2019). To address these questions, we used an interactive art/science experience that allowed us to collect neural activity using portable electroencephalography (EEG) from large numbers of museum and festival visitors at a wide range of recording sites (see Table S1 for a list of recording sites and the number of participants for each site). This interactive art/science BCI

setup allowed us explore the limits and opportunities afforded by conducting human social neuroscience research outside of the traditional laboratory context.

## METHODS

Pairs of participants sat inside the Mutual Wave Machine (Figure 2b) while we recorded their brain activity using 14-channel portable EMOTIV EPOC wireless EEG headsets (see Figure 2a for specifications, and e.g., Debener et al., 2012; Dikker et al., 2017, for a validation).

‘Brainwave synchrony’ (in this case, instantaneous band-limited correlations, described below) was translated into light patterns that were projected onto the surface of the installation (Figure 2b-d, see [wp.nyu.edu/mutualwavemachine](http://wp.nyu.edu/mutualwavemachine) for footage of the installation/setup) using custom-software developed in the C++ based OpenFrameworks library ([openframeworks.cc](http://openframeworks.cc)).

The exact data processing pipeline that was used to compute the inter-EEG correlations that fed into the visualizations varied between the locations listed in Table S1. For the BENAKI and LOWLANDS datasets described here, the following protocol was used. A moving-window of 6 seconds of data ( $6 * 128$  samples) was selected for real-time analysis approximately 30 times per second (the exact window-step size varied slightly as a function of the buffer size of incoming samples, which typically ranged between 4-8 samples per buffer). EEG data streams from the two participants’ headsets were synchronized using a 5-second window, based on the time that samples were received by the analysis computer, and then filtered into typical frequency bands using FFTW ([www.fftw.org](http://www.fftw.org); delta: 1-4 Hz; theta: 4-7 Hz; alpha: 7-12 Hz; beta: 12 -30 Hz). Within each frequency range, a sub-window was used to calculate Pearson correlation coefficients for each pair of sensors between headsets ( $n \times n$  sensors; delta:  $3 * 128$  window,  $0.7 * 128$  offset; theta:  $2 * 128$ ,  $0.6 * 128$  offset; alpha:  $1.1 * 128$  window,  $0.5 * 128$

offset; beta:  $0.6 * 128$  window,  $0.4 * 128$  offset). Both the average across all r-values for all sensor pairs and the highest r-value among all sensor pairs contributed to the correlation value for each frequency band (50/50). The four scores were then fed into a visualization algorithm in which four separate moiré patterns were created, growing in a circular motion from the center of each sphere as a function of the synchrony value in each frequency band, ranging between 0-1: a score of 1 was screen filling (Figure 2d-ii) and no visuals were projected if the value was 0 (Figure 2d-iii).

Although this setup makes “brain synchrony” intuitive to the general public, it is highly unlikely that these instantaneous band-limited correlations map onto inter-brain synchrony between the participants in a meaningful way. The main reason is that in a noisy environment, such as a museum, instantaneous band-limited correlations between the 2 EEG devices are likely to be dominated by shared noise rather than shared social events. Additionally, when correlating 2 short narrow-band signals, correlation values can be artificially inflated because of pure chance.

As described in the Procedure, participants were made aware of the caveats and limitations of the visualization and were discouraged to draw any meaningful conclusions based on their experience. Instead, they were told that for analysis, their brain synchrony would be recomputed later, offline, after removing motion artifacts and bad channels. They were told that once the analysis is done, findings would be made available on a public website.

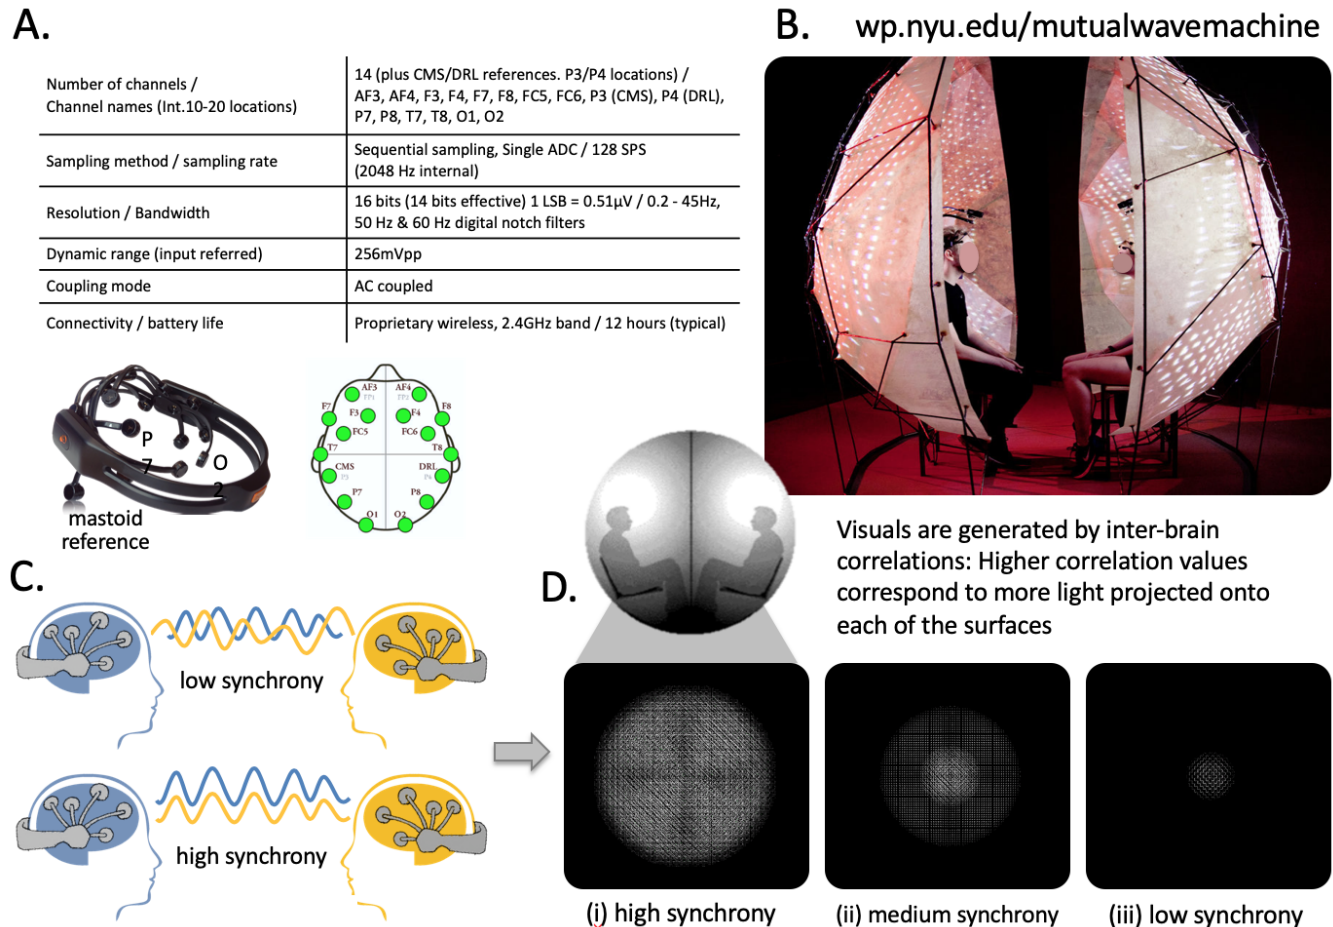

**Figure 2. The Mutual Wave Machine**

**(A)** Hardware specifications of the EMOTIV EPOC EEG headset, an image of the EMOTIV EPOC headset (side view), and a top-view of the electrode locations (note that electrode placement may vary considerably between participants, see e.g., Dikker et al., 2017); **(B)** A pair of participants inside the Mutual Wave Machine experiencing real-time inter-brain synchrony A/V feedback. **(C/D)** Inter-brain correlations between two participants wearing wireless EEG headsets were computed in real time. Higher inter-brain correlation values correspond to more light projected on each of the surfaces, with the focus point behind each participant's head. (See text for details).

## Participants & locations

EEG and questionnaire data were collected from a total of 4,800 people across 14 different sites (see Table S1). For the purposes of this paper, data were analyzed only from two sites. The Benaki Art Museum (BENAKI; Athens, Greece), where the Mutual Wave Machine was set up as part of the Marina Abramovic Institute exhibition AS ONE ([mai.art/as-one-content/2016/2/29/presenting-as-one](http://mai.art/as-one-content/2016/2/29/presenting-as-one)), provided our most comprehensive and consistent dataset (1,568 participants) and provided the best recording conditions: the Mutual Wave Machine was exhibited for 2 months in the same location, the data were collected by a well-trained and dedicated group of facilitators (see Acknowledgments), and there was minimal environmental distraction (at some of the other sites, the installation was placed in a crowded environments with a lot of environmental noise and distractions for both participants and experimenters). The second recording site included here is Lowlands Science (LOWLANDS), where 230 participants took part in the Mutual Wave Machine.

## Experimental procedure

Participants signed up for timeslots in advance, either individually or in pairs. EEG headsets were applied while participants completed a consent form (following Utrecht University Institute of Linguistics study protocol) and pre-experiment questionnaire (see below for details). After setup, participants were led to the Mutual Wave Machine, where they received further instructions.

In the BENAKI dataset, a subset of participants ( $n = 534$ ) was explicitly told that the light patterns reflected brain-to-brain synchrony (explicit synchrony A/V), while another group ( $n = 498$ ) was not (non-explicit synchrony A/V). In the LOWLANDS dataset, all pairs were told the

purpose of the work was to investigate the relationship between inter-brain synchrony and “feeling in sync”, but half of the participants were assigned to a sham A/V condition. For the latter group, the visualizations were randomly generated instead of reflecting the true correlated EEG signal. An additional difference in the LOWLANDS dataset was that, after the experience, participants were asked to list which “strategies” they used to try to connect to each other and increase brain synchrony.

Participants were encouraged to be mindful of their movements and were told that too much movement would create motion artifacts that could distort the signal and make it impossible to detect actual brainwaves in the EEG signal. To illustrate this, participants were shown the effects of jaw clenching, laughing, and blinking in their own raw EEG trace during setup.

After the experience, participants were led back to the setup station to fill out an additional set of questions. They were told that their data would be scientifically analyzed offline and that results would be made available on a publicly accessible web page ([wp.nyu.edu/mutualwavemachine](http://wp.nyu.edu/mutualwavemachine)). The experiment took approximately 20 minutes including setup and debriefing.

## Materials

To investigate which factors drive brainwave synchrony during spontaneous face-to-face interaction, participants were asked to fill out a series of questions designed to address their (a) relationship to each other, (b) affective personality traits, and (c) affective mental states.

(a) **Relationship metrics** were administered before the experience only, and included four variables. (i) As an index of **Relationship Duration (a trait measure)**, participants were given 6 choices to indicate how long they knew each other (varying from 1 = Strangers to 6 = 10+

years). (ii) **Social Closeness (a state measure)** between pairs was measured using the Inclusion of the Other in the Self Scale (Aron et al., 1992), in which participants are presented with 6 Venn diagrams where circles 'Self' and 'Other' overlap to varying degrees, and are asked which best applies to his/her relationship to the other.

(b) To quantify socially relevant **affective personality traits**, participants completed a revised version of the Interpersonal Reactivity Index during setup (IRI; Davis, 1980), including the subscales **Perspective Taking** (e.g., "When I'm upset at someone, I usually try to "put myself in his shoes" for a while."), and **Personal Distress** (e.g., "When I see someone who badly needs help in an emergency, I go to pieces"). The questionnaire consisted of 14-items answered on a five-point Likert scale ranging from "Does not describe me well" to "Describes me very well".

(c) Mental state metrics were measured both before and after the experience (Pre and Post) using a shortened version of the Positive and Negative Affect Schedule (PANAS-X; Watson & Clark, 1994). The questionnaire consisted of 20 items, with 10 items measuring Positive Affect, of which three items measured **Focus** (e.g., attentive, alert). The items were rated on a five-point Likert Scale, ranging from 1 = *Very Slightly or Not at all* to 5 = *Extremely*.



## Analyses

### Preprocessing pipeline

The initial pool of data consisted of EEG recordings of 1,568 participants in the BENAKI dataset, and 230 participants in the LOWLANDS dataset (see above and Table S1).

First, raw datasets with problems due to headset or recording software malfunction were identified and discarded. For the BENAKI dataset, 28 pairs were rejected because for one or both participants, less than 5 minutes of raw data were available, likely due to false starts or other recording issues (out of 10 minutes total; mean duration of all pairs = 551.6 s). An additional 117 pairs were rejected because of intermittent data loss (93 pairs), data repetition (34 pairs), or drift between the two headsets (3 pairs), factors that would render inter-brain synchrony analyses unreliable.

Next, we identified physiological artifacts or channel specific hardware artifacts. The EEG headset provides binary variables, sampled at the same rate as the data, which mark blinks or vertical/horizontal eye movements. All the instances for which these three flag variables were true were marked as artifacts, as well as 50 msec before and 250 msec after such instances. Subsequently, four different types of artifacts were identified using the Fieldtrip toolbox (Oostenveld, Fries, Maris, & Schoffelen, 2011). *Signal Jumps* are sudden (step-like) increases or decreases in the recorded electric field, usually attributed to the amplifier electronics. *EOG-like Artifacts* (electrooculography) were identified based on their typical band-limited characteristics (no EOG was recorded during the experiment). For the purpose of removing EOG-like artifacts, the EEG channels were band-passed by a Butterworth filter in the frequency range [1-15 Hz], then envelope time-series were derived through the Hilbert



transform, and times when this envelope exceeded 4 standard deviations from its mean were marked as potential EOG artifacts. Clipping Artifacts are periods when data in one or more channels remain constant at a given value and is usually caused by short-term problems in the electronics. Head Movements were identified through a 2-axis gyroscope built into the EEG headset, providing information about the orientation of the head at each data sample. Significant head movements are manifested as large changes on the accelerometer data. Instances with such changes, above 5 standard deviations from the mean change, were identified as head movement artifacts. Data instances with any of the above artifacts characteristics were marked as “bad” segments.

The EEG headset provides, at the same sampling frequency as the data, a quality flag for each of the data channels. This data quality flag is a measure of contact quality of a given electrode on the scalp during a recording, ranging from 0 to 4. Any channel with an average quality lower than 1 was identified as a noisy, “bad” channel and discarded from further analysis (still preserving some useful information).

After the bad channels were discarded from a dataset, the raw data were segmented into pseudo-trials of 1 second duration each, and all the pseudo-trials that coincided with “bad” segments, as described above, were completely removed from the data. This pseudo-trial representation was used so that in subsequent time-frequency and band-limited connectivity analysis data segments surrounded by discarded artifacts would have a duration of an integer number of seconds.

Once bad channels and bad segments were removed, one last automated preprocessing procedure was applied to further reduce the potential data contamination by artifacts. Given the nature of the electric signals emanating from the brain and measured on the scalp, the

variance of the recorded data should be similar across the different channels. Channels with consistently higher variance compared to the other channels across the whole recording are most likely to contain higher noise, likely due to electrical noise and not due to environmental noise (the latter would affect all channels similarly). In order to investigate such cases, each dataset was divided into 10 equally sized segments and the variance of each channel was computed for each segment. If, across most of the 10 segments, a channel was found to consistently have a variance higher than 2 standard deviations from the average variance over all channels, it was flagged as a “bad” channel. We also examined if specific trials showed much higher variance than the average variance across all trials. As the paradigm employed here did not include any specific stimulus presentation, the variance was expected to not have big fluctuations across time but stay within relative stable boundaries. Periods of higher variance are indicative of muscle or movement artifacts. So as a first step, all trials with a variance of larger than 3 standard deviations above the average variance across the recording in a channel were marked as artifacts. In addition to this channel-specific “bad” segment identification, a final similar analysis was performed, but this time the variance for each trial was averaged across channels. This reflected trials that have high variance consistently across all channels, probably due to higher environmental noise. Again, pseudo-trials with a variance larger than 3 standard deviations from the mean variance across the recording were marked as “bad” segments.

These “bad-channel” and “bad-segment” procedures were applied to the recordings of each of the participants in a given pair. This resulted in a cleaned dataset for each participant, comprising a set of 1-sec long pseudo-trials with gaps in the places where potential artifacts were identified. Only trials for which data were available for both participants (aligned trials)

were kept for further synchrony analysis. 331 pairs had missing or incomplete questionnaire data (due to internet connectivity issues at the museum; the questionnaires were administered using an internet-based platform), leaving 307 pairs for further analysis.

The same preprocessing procedure was applied to the LOWLANDS dataset and resulted in a total of 53 pairs (out of 115) to be included for further analysis.

### **Time-frequency analysis**

The raw continuous data was first demeaned and high-pass filtered at 0.5 Hz in order to remove slow fluctuations. Then all the “bad” channels and “bad” segments, defined through the methodology described above, were removed. Time-frequency analysis was performed using a Hanning-taper transformation based on multiplication in the frequency domain (Maris & Oostenveld, 2007). The investigated frequencies were between 1 and 40 Hz, in steps of 1 Hz. The time-frequency analysis was performed for all time points of the data. For each time point and given frequency, the spectral complex coefficient was computed from a data window centered at that timepoint. The length of the window was selected to be 5 periods of the frequency in question unless this exceeded 500 msec, in which case the window length was set to this maximum value. The different window lengths with regard to frequency created a frequency resolution different from the desired 1 Hz. In order to achieve this resolution, zero-padding was employed. This analysis resulted in a series of complex coefficients for each channel and frequency, with gaps where artifacts had been removed and when not enough data samples were available to fill the time-frequency window. These results were stored and used in the following connectivity analysis.

## Inter-brain functional connectivity analysis

Inter-brain synchrony can be measured in various ways. Here, it was quantified using two metrics: imaginary coherence and projected power correlations. This choice was motivated not only because of the proposed mechanisms they are argued to capture, but also because of the recording conditions. Specifically, synchrony can be manifested in the fluctuations of the recorded electrical signals themselves or in the fluctuations of the power envelopes of these signals. Coherence is the most typical functional connectivity metric employed to study the former type of synchrony, and power correlations are most often used for the latter. However, both metrics, especially when applied to EEG and MEG measurements, are highly contaminated by environmental noise, which is manifested as common signals with 0 phase difference across sensors and headsets. In the current study, such noise-induced zero-lag signals are even more pronounced, since the museum environment has higher noise than a typical EEG lab (e.g., via light installations on the ceiling as well as audio and video electronic equipment in the vicinity of the measurements).

To avoid such instantaneously synchronized EEG signals within pairs, which have no relevant neurocognitive interpretation, *Imaginary Coherence* (IC; synchrony in EEG signal fluctuations; (Nolte et al., 2004) and *Projected Power Correlations* (PPC; synchrony in the signal envelopes after the projection of one signal on the other has been removed; Hipp, Hawellek, Corbetta, Siegel, & Engel, 2012) were employed instead (schematic in Figure 2e). Assume there are two EEG channel recordings  $x(t)$ ,  $y(t)$  whose time-frequency spectral coefficients series are  $X(t, f)$  and  $Y(t, f)$ . Imaginary coherence takes two series of complex spectral coefficients and computes the cross spectral density  $S_{xy}(f)$  between them (eq. 1.3) and the auto spectral density (power) of each of them,  $S_{xx}(f)$ ,  $S_{yy}(f)$  (eq. 1.1 and 1.2). From

these, it computes the Coherency  $C_{xy}(f)$  (eq.1.4), a complex number whose phase describes the average phase difference between the two series and whose magnitude describes how consistent this phase difference is. This complex number is decomposed in a real and an imaginary part. The real part represents how much of the magnitude is driven by instantaneous interactions and the imaginary part represents how much by lagged interactions. Imaginary Coherence  $IC(f)$  is the absolute value of the imaginary part, thus represents only lagged interactions (Nolte et al., 2004). Imaginary coherence in the frequency range investigated here (1 to 40 Hz) captures phase differences between signal fluctuations in the range of tens of milliseconds.

$$S_{xx}(f) = \sum_{t=1}^N X(t, f) \cdot X^*(t, f) \quad (1.1) \quad S_{yy}(f) = \sum_{t=1}^N Y(t, f) \cdot Y^*(t, f) \quad (1.2)$$

$$S_{xy}(f) = \sum_{t=1}^N X(t, f) \cdot Y^*(t, f) \quad (1.3)$$

$$C_{xy}(f) = \frac{S_{xy}(f)}{(S_{xx}(f) \cdot S_{yy}(f))^{\frac{1}{2}}} \quad (1.4)$$

$$IC(f) = |\text{imag}(C_{xy}(f))| \quad (1.5)$$

The Projected Power Correlation  $PPC(f)$ , as it is called in this paper for convenience, takes two series of complex spectral coefficients and computes the correlation between their magnitudes (envelopes) after first removing the projection of one series on the other, so that all instantaneous signal fluctuations are removed before the envelope is extracted (Hipp et al., 2012). So first the projection of  $Y(t, f)$  on  $X(t, f)$  is removed, leaving only the signal orthogonal to it  $Y_{\perp X}(t, f)$  (eq. 1.6; Hipp et al., 2012). Then the correlation between  $|Y_{\perp X}(t, f)|$  and  $|X(t, f)|$  is computed across time. The same is done also between  $|X_{\perp Y}(t, f)|$  and  $|Y(t, f)|$  (eq. 1.7). Note that  $\hat{e}_{\perp Y}$  and  $\hat{e}_{\perp X}$  are unit vectors representing the phases of the

complex numbers and do not influence the magnitudes. Here it must be clarified that although instantaneous fluctuations of the signals are removed, the fluctuations of the envelopes of the remaining signals can still have zero phase difference, but this will not be due to a common signal present in both signals. Projected Power Correlation in the frequency range investigated here captures envelope fluctuations in the range of hundreds of milliseconds. So this analysis captures much slower processes than Imaginary Coherence.

$$Y_{\perp X}(t, f) = \text{imag} \left( Y(t, f) \cdot \frac{X^*(t, f)}{|X(t, f)|} \right) \hat{e}_{\perp X} \quad (1.6)$$

$$X_{\perp Y}(t, f) = \text{imag} \left( X(t, f) \cdot \frac{Y^*(t, f)}{|Y(t, f)|} \right) \hat{e}_{\perp Y} \quad (1.7)$$

The computation of the above metrics was performed as follows. A moving window of 2-sec duration was employed to move along the series of complex spectral coefficients that were computed in the time-frequency analysis (Figure 3a). The time step this window moved at every iteration was 10 data samples ( $10 \cdot 1/128\text{Hz} = 70.81 \text{ msec}$ ; Figure 3b). At each iteration, all the spectral coefficients that fell within the window were selected from each matched electrode of the two headsets used in a given pair. These two time-series of spectral coefficients were then used in the computations of the connectivity metrics, and each connectivity metric was averaged across channels (Figure 3c). This was repeated for each step iteration of the moving window, so that at the end of all iterations a series of connectivity metric values across time were computed. Then the average connectivity across time was computed. This process resulted in a single value for each connectivity metric per frequency per pair (Figure 3d).

The same process was also performed in the early and late halves of the data in order to investigate if engagement of the participants in the experiment increased or decreased inter-brain connectivity and if such gradients correlated with behavior.

## **Correlation of inter-brain connectivity with behavioral data**

Once the two connectivity metrics were computed for each pair and frequency, the next step was their correlation with behavioral metrics derived from the questionnaires (see Materials). This was quantified by computing Pearson correlation coefficients between a given connectivity metric and a given behavioral variable for a given frequency across all pairs, accompanied by the p-value of the Pearson's coefficient. This was repeated for all 40 frequencies for which the connectivity metric was computed. Correction for multiple comparisons was implemented as follows. With the typical significance p-value threshold of 0.05 and 40 frequencies, traditional correction approaches such as Bonferroni and False Discovery rate are very conservative, highly insensitive, and fail to incorporate the fact that significant effects tend to occur in clusters along the frequency axis. Cluster-based nonparametric statistical tests based on random permutations<sup>68</sup> solve the multiple comparison problem while preserving sensitivity. These non-parametric tests were used as follows. The Pearson correlation coefficient was initially computed between connectivity metric  $M(f)$  at frequency  $f$  and behavioral variable  $B$ . This was repeated across all frequencies. Then correlation significance thresholds  $Th_{upper}$  and  $Th_{lower}$  were selected at the 5% and 95% percentiles of the correlation distribution for all frequencies, respectively. Then the random permutation procedure took place. The order of the behavioral variable values was randomly shuffled and the correlation with the connectivity metric was repeated. All correlation values

exceeding thresholds  $Th_{upper}$  and  $Th_{lower}$  were marked as significant and it was investigated if they formed clusters in adjacent frequencies. For each of these randomly significant clusters, a cluster statistic was computed. Different options were available for this average cluster statistic, such as the maximum correlation value, the average correlation value, or the size of the cluster. The extend of the cluster was chosen here because typical intrinsic oscillatory phenomena in the brain span a range of frequencies rather than single frequencies, and this should be a prominent feature in this correlational analysis too. So the randomly significant cluster with the maximum size was found and its size was stored. This random permutation procedure was repeated 500 times. At the end of this procedure, a distribution of the 500 largest random cluster sizes was formed against which all the clusters from the actual data correlation, performed at the very beginning, were compared. If an actual data cluster had a size larger than the 95% threshold of the random distribution, it was marked as significant (Figure 3f). This procedure was applied to each connectivity metric and each behavioral variable.



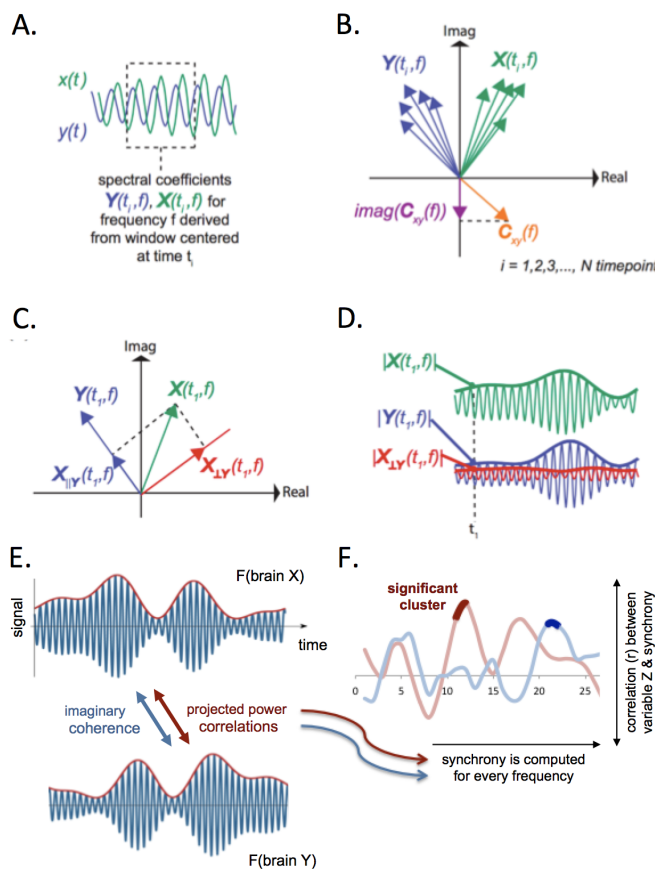

**Figure 3. Inter-Brain functional connectivity measures.**

**(A)** A 2-second moving window was used along each of the time-series  $x(t)$  and  $y(t)$  correspond to the 2 different participants of a pair of EEG recordings in order to compute the time-series of spectral coefficients  $X(t_i, f), Y(t_i, f)$  (one spectral coefficient per time-window  $i$ , per frequency  $f$  and participant). **(B)** These spectral coefficients for the 2 different participants can be visualized as pairs of vectors  $X(t_i, f), Y(t_i, f)$  at each time instance  $i$  (and frequency  $f$ ). These vector pairs are then used to compute the complex coherence  $C_{xy}(f)$ , which reflects how consistent is the phase difference (angle) between the 2 participants, i.e across all spectral coefficient pairs  $X, Y$  (across time).

Imaginary coherence constitutes only the imaginary part of coherence, reflecting only non-instantaneous phase relations (other than 0). **(C)** Projected Power Correlation: the vector of a spectral coefficient from

one participant  $X(t_i, f)$  can be decomposed into 2 orthogonal projections. One projection parallel to the vector  $Y(t_i, f)$  of spectral coefficient of the other participant,  $X_{\parallel Y}(t_i, f)$  and one projections perpendicular to it,  $X_{\perp Y}(t_i, f)$ . The parallel projection represents the part of the signal that is common between the 2 participants; as this reflects instantaneous co-fluctuations, it is removed before computing power correlations between the 2 participants. **(D)** Projected Power Correlation: The perpendicular projection  $X_{\perp Y}(t_i, f)$  is the part of  $X(t_i, f)$  that is used to compute power correlations with  $Y(t_i, f)$ . **(E)** Conceptual depiction of the features that are captured by imaginary coherence and projected power correlation, computed between the EEG signals of 2 different brains X and Y. Imaginary coherence describes how consistent the phase difference is between the 2 EEG signals (EEG signals are depicted with blue). Projected power correlation describes how correlated the fluctuations are of the Envelopes of the 2 EEG signals (signal envelopes are depicted by red). **(F)** Imaginary Coherence and Projected power correlations between participants were computed at each frequency from 1 – 40 Hz and were subsequently correlated with one of the behavioral variables of interest (here termed  $Z$ ); a cluster analysis was used to determine significant clusters of at least 2 consecutive frequencies (dark red/blue). See text for detailed description.

## RESULTS

The results below quantify correlations between behavioral variables and inter-brain synchrony in the BENAKI dataset, unless indicated otherwise. All reported p-values survived correction for multiple comparisons using a False Discovery Rate approach (FDR; Benjamini & Hochberg, 1995).

Socially relevant trait measures, including pairs' relationship (Aron et al., 1992) and affective personality traits (Davis, 1980), were correlated with brain synchrony averaged across the entire 10-minute experience. For pairs' focus and motivation, we instead examined changes in inter-brain synchrony: the difference between the average inter-brain synchrony during the second half of the experience and the first half of the experience was correlated with these state measures. Inter-brain synchrony was quantified in two different ways. First, Projected Power Correlations capture band-limited power fluctuations at different oscillatory frequencies. These power fluctuations represent relatively slow processes (on the order of seconds) and represent the overall strength of neural activation. With "overall strength of neural activation" at a particular frequency, we mean greater number of neurons firing synchronously at a particular frequency. The larger the number of neurons firing synchronously at that frequency, the larger the magnitude of the measured electric field at this frequency and the higher the power. Note, however, that projected power correlation quantifies the level of co-fluctuation of this magnitude across time between two signals and not of the phase of firing. In addition to power fluctuation synchrony, we also examined the consistency of phase alignment between oscillations in the brains of the two participants in each pair (Imaginary Coherence). This metric represents much faster processes, on the order of tens of milliseconds, and is independent of the strength of neural activity. Mindful of the data quality

disadvantage when conducting neuroscience research in a non-laboratory context, we took advantage of the large size of our dataset to adopt strict inclusion criteria. First, we decided to focus our analysis on only one recording site (1,568 people) for consistency purposes, which was further reduced to a group of 614 datasets that met a high data quality threshold. Furthermore, as discussed in the Introduction and described in the Methods, our synchrony metrics were chosen so that the effect of instantaneous brain signal co-fluctuations is minimized, circumventing contamination by environmental electrical noise present in the museum environment.

### **Intrinsic motivation: relationship and personality traits predict inter-brain synchrony**

We first explored whether properties of pairs' relationship predicted the average inter-brain synchrony across the 10-minute experience (cf. Figure 1b). Cluster statistics revealed significant effects of both relationship duration (a trait measure) and social closeness (a state measure; Aron et al., 1992). People who knew each other longer showed stronger inter-brain synchrony in the lower frequency ranges (Figure 4a, projected power correlations at 8 Hz;  $r(302) = .1776$ ;  $p = .0019$ ). Pairs who on average felt closer to each other also showed more inter-brain synchrony with each other during the experience, in the beta-frequency range (Figure 4b; imaginary coherence at 21-22 Hz;  $r(307) = .1552$ ,  $p = .005$ ). Note that there was no difference in synchrony between strangers and pairs who already knew each other, in contrast to previous findings (Kinreich et al., 2017).

Figure 4c shows the correlation plots for affective personality traits (Davis, 1980) and inter-brain synchrony. Perspective Taking did not affect the average inter-brain synchrony across the experience (dashed line), but Personal Distress did (solid line): At ~15-16 Hz, there

was a negative correlation between pairs' average Personal Distress and their projected power correlations ( $r(300) = -0.1757$ ,  $p = .0023$ ), indicating that less emotionally self-oriented pairs (as measured through less Personal Distress), showed more synchrony overall.

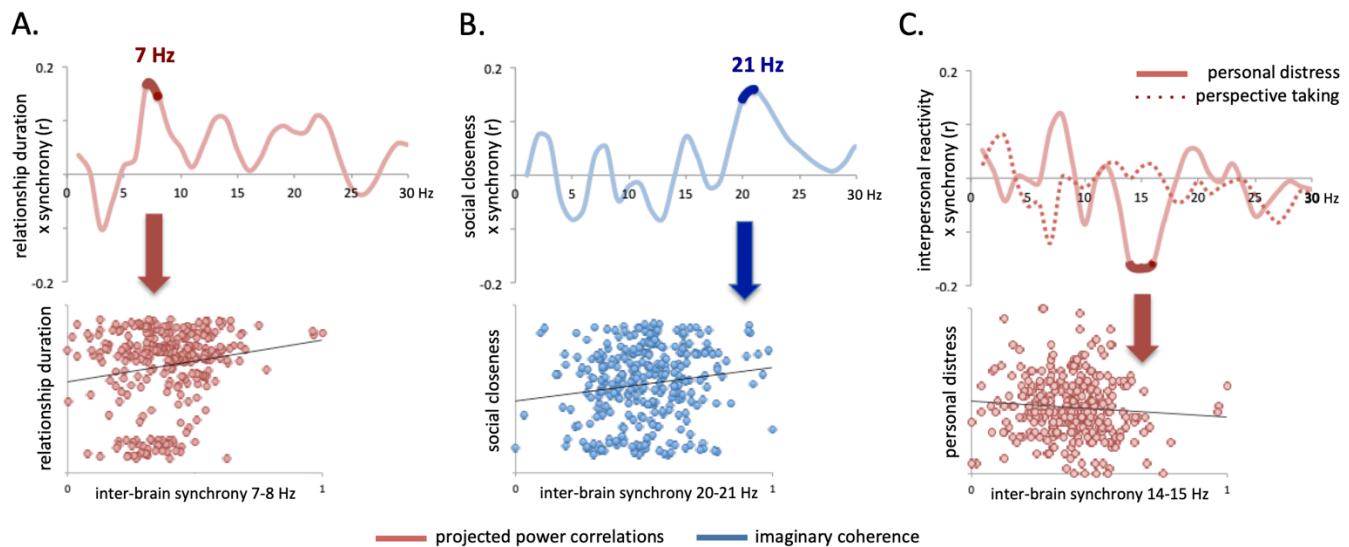

**Figure 4. Inter-brain synchrony is correlated with pairs' relationship and with their affective personalities**

Inter-brain synchrony was significantly correlated with **(A)** relationship duration (projected power correlations at 7-8 Hz;  $r(302) = 0.1776$ ;  $p = 0.0019$ ) and **(B)** social closeness (imaginary coherence at 21-22 Hz;  $r(307) = 0.1552$ ,  $p = 0.005$ ). **(C)** A significant negative correlation was found between Personal Distress and inter-brain synchrony (projected power correlations at 14-15 Hz;  $r(300) = 0.1757$ ;  $p = 0.0023$ ). No significant correlation between Perspective Taking and inter-brain synchrony was found. Values are max-min normalized for presentation purposes and correlation plots show the average for each significant cluster.

### Pairs' changes in focus predict inter-brain synchrony

Next, we asked whether changes in pairs' mental state, in particular focus level (Watson & Clark, 1994) was associated with changes in inter-brain synchrony (cf. Figure 1c). When comparing participants' self-reported focus before and after the experience, we saw that 182

pairs showed a decrease in self-reported focus over time, while 84 pairs reported an increase in focus (all participant pairs Focus Pre vs. Focus Post:  $t(1, 452) = 6.8747$ ,  $p < .0001$ ; Focus Pre:  $M = 3.3392$ ,  $SD = 0.6272$ ; Focus Post:  $M = 3.1428$ ,  $SD = 0.7224$ ). For the group of pairs whose focus decreased, a smaller decrease was associated with a higher increase in projected power correlations at 6-7 Hz for the second compared to the first half of the experience ( $r(182) = 0.189$ ,  $p = 0.0106$ ). For the group who reported to be more focused after than before the experience, a higher increase in focus was associated with a higher increase in imaginary coherence ( $r(84) = 0.2975$ ,  $p = 0.006$ ). In other words: maintaining focus led to an increase in inter-brain synchrony over time.

### **Changes in low frequency synchrony are paired with changes in high frequency synchrony**

Interestingly, both pairs' self-reported focus and the nature of their relationship were correlated with projected power correlations at 7-8 Hz and imaginary coherence at 20-21 Hz respectively. We thus explored the relationship between the two inter-brain synchrony measures at these two frequency ranges and found them to be coupled: changes in lower frequency projected power correlations at 7-8 Hz were positively correlated with changes in imaginary coherence at 20-21 Hz (Figure 5B:  $r(73) = .2776$ ,  $p = .0174$ ).

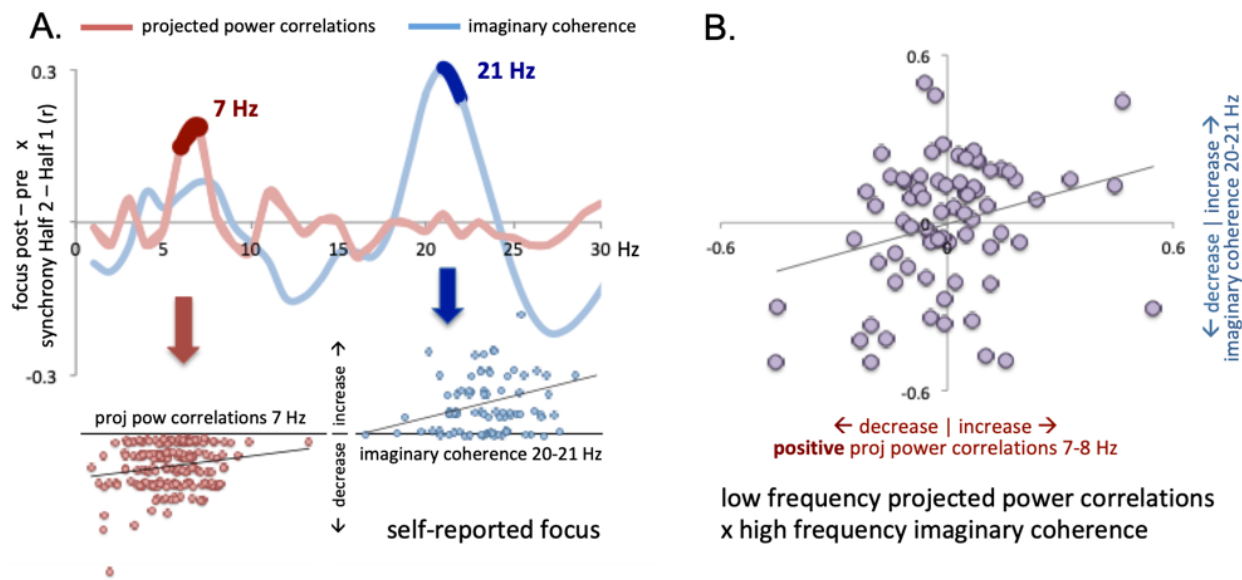

**Figure 5. Inter-brain synchrony is correlated with pairs' focus level, and low frequency inter-brain synchrony predicts high frequency inter-brain synchrony**

**(A-left)** Pairs with a smaller decrease in focus and **(A-right)** pairs with a relatively higher increase in focus exhibited a relatively higher increase in inter-brain synchrony in the second than the first half of the experience, in projected power correlations at 6-7 Hz ( $r(182) = 0.1889$ ,  $p = 0.0106$ ) and imaginary coherence at 20-21 Hz ( $r(84) = 0.2975$ ,  $p = 0.006$ ) respectively. **(B)** Changes in 7-8 Hz projected power correlations were positively associated with changes in imaginary coherence when comparing inter-brain synchrony during the first half and the second half of the experience ( $r(73) = 0.2776$ ,  $p = 0.0174$ ). Pairs with negative projected power correlations are excluded. Values are max-min normalized for presentation purposes and correlation plots show the average for each significant cluster.

### Extrinsic motivation: inter-brain synchrony is enhanced by explicit “synchrony” A/V

So far, we have shown that affective traits as well as mental states predict (changes in) brain synchrony during face-to-face interaction. We next asked whether pairs that were more motivated to connect also synchronized more (cf. Figure 1d). As described in the Methods, pairs from the BENAKI dataset were divided into two groups: one group was explicitly told that

the visuals were derived from their correlated EEG signal (explicit synchrony A/V), while the other group did not (non-explicit synchrony A/V). We hypothesized that the feedback instructions would function as a motivational factor to remain focused on the other. Indeed, pairs in the explicit feedback group showed an increase in inter-brain synchrony for the second vs. the first half of the experience (Figure 6; Half 1 vs. Half 2 projected power correlations at 18-21 Hz:  $t(1, 138) = 2.7049$ ,  $p = 0.0077$ ,  $M = 0.037$ ,  $SD = 0.1619$ ). One plausible explanation for this discrepancy is that the “explicit feedback” group was more motivated to maintain focused, or engaged with the other person throughout the 10-minute experience: the visual environment functioned as a constant reminder of the task, namely to connect to the person directly opposite.

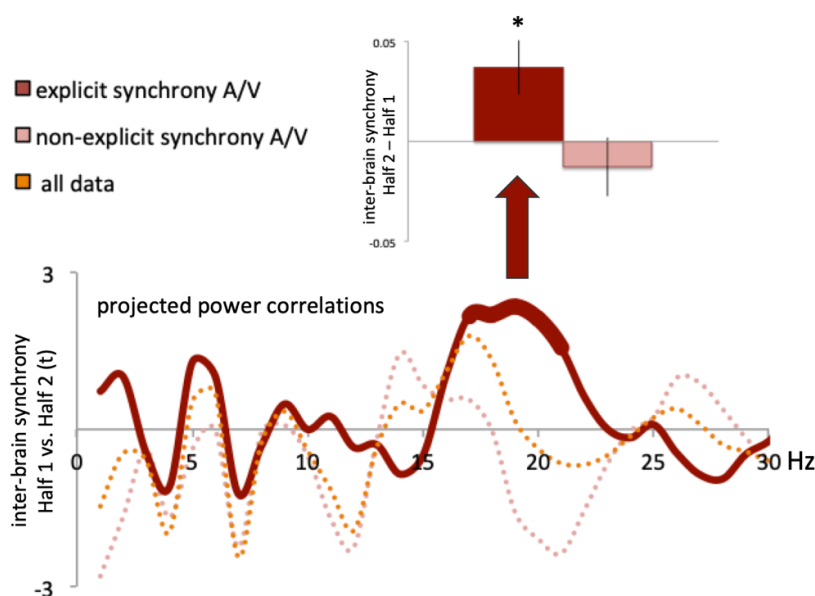

**Figure 6. Extrinsic motivation to connect leads to an increase in inter-brain synchrony**

Pairs who received no explicit explanation of the relationship between the A/V environment and inter-brain correlations showed no significant changes in inter-brain synchrony over time; Pairs in the explicit feedback group exhibited higher inter-brain synchrony for the second vs. the first half of the experience (projected power correlations at 18-21 Hz:  $t(1, 138) = 2.7049$ ,  $p = 0.0077$ ,  $M = .037$ ,  $SD = .1619$ ). Values are max-min normalized for presentation purposes. Error bars reflect standard errors of the mean.



Indirect support for such a shared engagement account of inter-brain synchrony comes from the following set of observations in our data. First, while the “no explicit feedback” group exhibited a decrease in focus ( $t(1, 209) = 3.1647$ ,  $p = 0.0018$ ,  $SD = .1499$ ) for the post vs. pre questionnaire, the “explicit feedback” group showed no significant changes in focus. A second, related, observation is that self-reported focus did not predict changes in inter-brain synchrony when restricting the analyses reported in Figure 5a to the “explicit feedback” group alone. Importantly, the relationship between inter-brain synchrony and pairs’ relationship or personality traits was unaffected by the instructions pairs’ received about the task and A/V environment (See supplemental Figure S1 for details). Thus, manipulating pairs’ extrinsic motivation to socially engage appeared to exclusively override the effect of self-reported focus on inter-brain synchrony.

A final piece of evidence in support of the proposed role of shared engagement in inter-brain synchrony comes from the finding that participants’ inter-brain synchrony changes were not affected if they were presented with a sham A/V environment. Recall that half the pairs in the LOWLANDS dataset saw visuals that were randomly generated rather than being controlled by true inter-brain synchrony values. Importantly, all pairs in the LOWLANDS dataset were explicit told that the A/V environment was related to their ongoing inter-brain synchrony. As shown in Figure S2, in contrast to the BENAKI pairs, where only the “explicit feedback” group showed an increase in inter-brain synchrony for the second compared to the first half of the experience, in the LOWLANDS dataset inter-brain synchrony increased over time for all pairs irrespective of whether the inter-brain synchrony environment was true or sham (projected power correlations at 16-18 Hz:  $t(1,55) = 3.2379$ ,  $p = 0.002$ ,  $SD = 0.0193$ ; i.e., in the same frequency range as for the BENAKI data shown in Figure 6). This suggests that *believing* that



the visuals were directly related to the success of the interaction motivated participants to remain socially engaged, irrespective of the actual relationship between inter-brain synchrony and the visual environment.

Importantly, no other differences were observed between the two datasets: with the exception of social closeness, all findings reported in Figures 4 and 5 for the BENAKI dataset were replicated in the LOWLANDS dataset (See Figure S2 for details). A further minor difference was that the frequency ranges of the projected power correlations were a bit higher for the LOWLANDS dataset (~10 Hz as opposed to 8 Hz). This could be due to age differences between the two groups: Alpha peak frequency is typically lower for older than for younger adults (e.g., Duffy, McAnulty, & Albert, 1993) and while no age information available for the BENAKI participants, the music festival Lowlands is known to attract a younger demographic than the Benaki art museum.

### **Social behavior as an exogenous synchronizer**

Finally, we asked whether the type of social behavior that pairs engaged in during the social interaction was predictive of their inter-brain synchrony (Cf. Figure 1e; LOWLANDS dataset only). Participants listed a number of different strategies they used to try to synchronize with one another, which included “no strategy” (10.7% of pairs), and “stimulus entrainment” (focusing on the visuals: 37.5% of pairs), in addition to three main categories of social behavior: “eye contact” (71.4% of pairs), “joint action” (performing the same physical action such as smiling or having a conversation, playing hand games: 25% of pairs), and “joint thought” (thinking about the same object, event, or each other: 32 % of pairs). As can be seen in Figure 7a-b, “eye contact” and “joint action” were positively associated with inter-brain

synchrony (eye contact: projected power correlations at 9-11 Hz ( $r(56) = 0.3786$ ,  $p = 0.0040$ ) and 26-30 Hz ( $r(56) = 0.3509$ ,  $p = 0.008$ ); joint action: imaginary coherence at 18-21 Hz ( $r(56) = 0.3651$ ,  $p = 0.0057$ ), but “joint thought” was not predictive of inter-brain synchrony (Figure 7c).

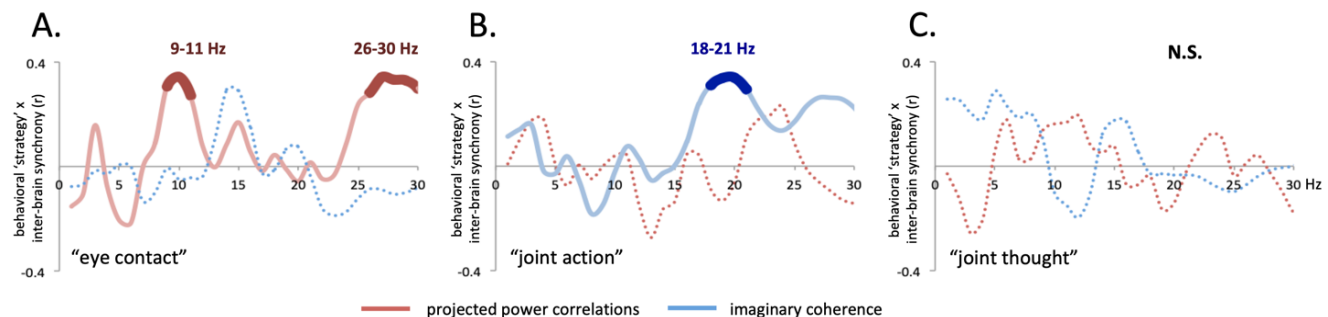

**Figure 7. Synchronizing “strategies” predict inter-brain synchrony in the Lowlands dataset**

Using (A) “eye contact” or (B) “joint action” as strategies to connect was positively associated with inter-brain synchrony (eye contact: projected power correlations at 9-11 Hz ( $r(56) = 0.3786$ ,  $p = 0.0040$ ) and 26-30 Hz ( $r(56) = 0.3509$ ,  $p = 0.008$ ); joint action: imaginary coherence at 18-21 Hz ( $r(56) = 0.3651$ ,  $p = 0.0057$ ), but (C) “joint thought” strategies were not. See main text for a description of the categories. Values are max-min normalized for presentation purposes.

## DATA AND RESULTS DISSEMINATION

All data is made publicly available at <https://osf.io/hpgkt/> and the results are disseminated to participants and the general public via [wp.nyu.edu/mutualwavemachine](http://wp.nyu.edu/mutualwavemachine)

## DISCUSSION

In an effort to explore the neural correlates of real-world social behavior, we present data acquired in a novel context departing from laboratory-constrained cognitive neuroscience. Building on recent technical and analytic advances in recording neural data from groups in natural settings, we extended such data acquisition approaches in a new direction, recording EEG from a very large number of people, recruited from the general public, as they engaged in naturalistic face-to-face interaction. Specifically, we created an interactive neurofeedback art experience, the Mutual Wave Machine, which allowed us to ask how pairs' relationship, personality traits, mental states, and social behavior predicted inter-brain synchrony during face-to-face interactions, extending ongoing laboratory research on neuronal oscillations and their role in perception and cognition, as well as previous EEG hyperscanning studies (Babiloni et al., 2007; Dumas et al., 2010; Kinreich et al., 2017; Pérez et al., 2018; Sängler, Müller, & Lindenberger, 2012; and many others). We employed a 'crowdsourcing' neuroscience approach, recruiting museum visitors and festival goers to help us explore our research questions. For example, we asked participants to indicate what kind of behavior *they* thought had helped them synchronize their brain activity.

In a subgroup of 726 participants whose data survived rigorous criteria licensing further analyses, we found that inter-brain synchrony was positively related to pairs' social closeness, personality traits, focus level, and motivation to connect. Further, modulations in alpha synchrony (projected power correlations) co-varied with changes in beta coherence (at 21-22 Hz), suggestive of a relationship between lower and higher frequency inter-brain synchrony.

## Shared attention and engagement

In line with previous work, our findings invite an interpretation based on shared attention, or shared engagement (Cohen, Henin, & Parra, 2017; Dikker et al., 2017; Ki, Kelly, & Parra, 2016), illustrated in Figure 8.

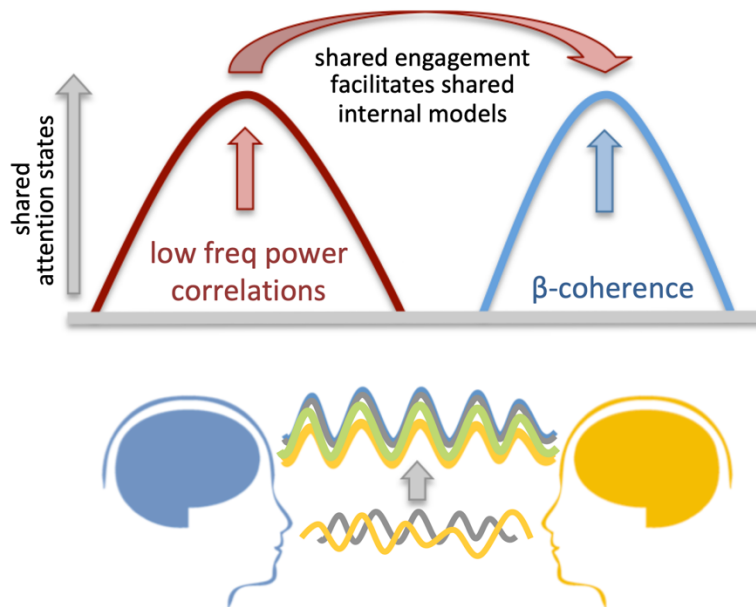

**Figure 8. Shared engagement facilitates the formation of shared internal models**

A schematic model showing how two people who have more instances in shared attention ('moments of meeting') can be measured as similar low frequency power changes, which in turn enables the tuning of shared internal models.

Projected power correlations, by hypothesis, would capture whether pairs show concurrent changes in attentive states, with positive correlations indicating that they are (in)attentive at the same time and low correlations or negative correlations indicating that they do not often share the same attentional state during the experience. 'Synchrony', thus, does not imply that pairs maintain a high focus level throughout the experience, just that their in-and-out of attention states co-fluctuate. Pairs who are more often in an attentive state together (similar alpha power

changes) are more likely to simultaneously pay attention to each other's actions or other cues from the surrounding environment, resulting in more similar neural representations or predictions (Arnal & Giraud, 2012). In other words, shared attention states facilitate interpersonal brain synchrony at the oscillatory phase level (beta synchrony).

Inter-brain synchrony in the beta band as a function of (social) attention converges with research showing that joint action is supported by oscillatory activity in the beta frequency range. Beta/mu rhythms, typically measured over sensorimotor areas (Hari, 2006; Pineda, 2005), have been associated with attention (Anderson & Ding, 2011), motor control and motor simulation (Pfurtscheller & Lopes da Silva, 1999), as well as prediction of another person's actions (Sebanz et al., 2006). Changes in beta/mu are observed both when people perform an action and when they watch someone perform a similar action (Nishitani & Hari, 2000). Crucially, beta activity during action perception varies as a function of social evaluation (Koelewijn, Van Schie, Bekkering, Oostenveld, & Jensen, 2008) as well as social traits such as empathic concern (Perry, Troje, & Bentin, 2010) and, in line with our findings, Personal Distress (Saarela et al., 2007; Yang, Decety, Lee, Chen, & Cheng, 2009). Our work also links to previous EEG studies comparing neural oscillations between people during interpersonal coordination tasks (Babiloni & Astolfi, 2014; Dumas et al., 2010; Sanger et al., 2012; Szymanski et al., 2017). For example, recent work by Novembre and colleagues (Novembre, Knoblich, Dunne, & Keller, 2017) showed that dual in-phase 20 Hz brain stimulation enhanced interpersonal movement synchrony between two participants performing a finger-tapping task. We expand on these findings by showing that brain-to-brain synchrony in the beta frequency range is sensitive to interpersonal factors such as affective personality traits during real-world face-to-face social interaction, which can further be linked to research that has associated beta

oscillations with endogenous content representations and expectations (Arnal & Giraud, 2012; Spitzer & Haegens, 2017).

In sum, we propose an account wherein shared attention (Dikker et al., 2017; Kang & Wheatley, 2017; Ki et al., 2016; Leong, Byrne, & Clackson, 2017), measured via an increase in projected power correlations in the alpha frequency range, provides ‘temporal windows of opportunity’ to establish shared (motor, perceptual, cognitive) representations, measured via an increase in imaginary coherence at 20 Hz.

### **On conducting “neuroscience in the wild”**

Carrying out “crowdsourcing” neuroscience research outside of the laboratory comes with many benefits, but also a number of challenges. First, it is near-impossible to obtain full experimental control in public spaces, and this project was especially challenging in this regard. For example, the LOWLANDS dataset was collected during a music festival, which required extra care with respect to noise contamination from surrounding events. Further, due to the sheer number of participants as well as other logistical and privacy-related considerations, we were unable to keep a close record of participant behavior during the interaction. As a result, we had to rely on participant self-report (see Figure 7), which provided us with information to assess the brain-behavior relationship during the social interactions, but of course this information was incomplete.

Another challenge was the hybrid art/science/tech nature of the Mutual Wave Machine. While participants took their roles seriously in both BENAKI and LOWLANDS, for a few other sites listed in Table S1, visitors did not treat the experience as a scientific experiment but rather as a curiosity (e.g., taking selfies instead of interacting with each other). People were

also often waiting in line to participate, sometimes even getting impatient, jeopardizing the setup and reliability of their questionnaire responses. At these sites, the experience was shortened to 6 minutes or less. For these and other reasons, we only analyzed datasets that were collected during multiple days and where 20-minute timeslots were assigned with 5- to 10-minute buffers on each side. At BENAKI, participants further self-selected by signing up in advance via an online portal.

Another challenge relates to equipment. The EEG devices used here (EMOTIV) were very suitable for our purposes because they are sturdy, fast to apply, easy to handle, and affordable. However, data quality may be lower compared to laboratory-grade equipment (Krigolson, Williams, Norton, Hassall, & Colino, 2017). As discussed in the Methods, we took various steps to ensure that our data met rigorous standards despite these limitations.

On the flipside, the benefits of conducting neuroscience research outside of traditional laboratory environments are clear. First, using a citizen science approach affords researchers the opportunity to collect data from large numbers of people with a more varied demographic profile than the typical participant population of laboratory neuroscience research. Further, actively involving the general public in research has a number of benefits beyond constituting a rich opportunity for neuroscience outreach and education: While it is common to view interactions between scientists and the general public as merely unilateral (scientists educate the public about their work), we would like to argue that interactions with artists, educators, and the general public can inform scientific inquiry in a fruitful way: non-specialists may force scientists to remain aware of any translational value of their work to everyday practice, challenge methodological approaches that are taken for granted, and inspire research questions that may inform laboratory research. To close with an emphasis on the latter point:

while the field may be ‘ready’ for real-world neuroscience (Matusz, Dikker, Huth, Perrodin, 2019), in our opinion it will flourish only if paired with rigorous laboratory-based work and solid, careful methodology.

## CONCLUSION

A large group of museum and festival visitors engaged in dynamic face-to-face interactions while their brain activity was recorded using EEG. This setup made it possible to explore the limits and opportunities afforded by conducting human social neuroscience research outside of the traditional laboratory context. Drawing on our two most comprehensive datasets to date, we were able to evaluate how intra- and interpersonal factors predict the extent to which brain activity becomes synchronized between people during face-to-face interaction. Pairwise synchronized brain activity was related to people’s relationship, affective personality traits, mental states, as well as their motivation and strategy to connect to the other person. We propose an account for brain-to-brain synchrony in which shared engagement provides a vehicle for synchronous brain activity (measured in the alpha and beta frequencies, respectively), and joint action is used to mutually adapt neural and behavioral representations. Taken together, we demonstrate that an unconventional, ‘crowdsourcing neuroscience’ approach can provide valuable insights into the brain basis of dynamic real-world social behavior.

## Competing Interest Statement

The authors have no competing interests to declare.



## References

- Anderson, K. L., & Ding, M. (2011). Attentional modulation of the somatosensory mu rhythm. *Neuroscience*, 180, 165–180.
- Arnal, L. H., & Giraud, A.-L. (2012). Cortical oscillations and sensory predictions. *Trends in Cognitive Sciences*, 16(7), 390–398.
- Aron, A., Aron, E. N., & Smollan, D. (1992). Inclusion of other in the self scale and the structure of interpersonal closeness. *Journal of Personality and Social Psychology*, 63(4), 596.
- Astolfi, L., Cincotti, F., Mattia, D., De Vico Fallani, F., Salinari, S., Vecchiato, G., ... Babiloni, F. (2010). Imaging the social brain: multi-subjects EEG recordings during the “Chicken’s game.” *2010 Annual International Conference of the IEEE Engineering in Medicine and Biology*, 1734–1737.  
[ieeexplore.ieee.org](http://ieeexplore.ieee.org).
- Babiloni, F., & Astolfi, L. (2014). Social neuroscience and hyperscanning techniques: past, present and future. *Neuroscience and Biobehavioral Reviews*, 44, 76–93.
- Babiloni, F., Astolfi, L., Cincotti, F., Mattia, D., Tocci, A., Tarantino, A., ... De Vico Fallani, F. (2007). Cortical activity and connectivity of human brain during the prisoner’s dilemma: an EEG hyperscanning study. *Conference Proceedings: ... Annual International Conference of the IEEE Engineering in Medicine and Biology Society. IEEE Engineering in Medicine and Biology Society. Conference, 2007*, 4953–4956.
- Benjamini, Y., & Hochberg, Y. (1995). Controlling the False Discovery Rate: A Practical and Powerful Approach to Multiple Testing. *Journal of the Royal Statistical Society. Series B, Statistical Methodology*, 57(1), 289–300.
- Bevilacqua, D., Davidesco, I., Wan, L., Chaloner, K., Rowland, J., Ding, M., ... Dikker, S. (2019). Brain-to-Brain Synchrony and Learning Outcomes Vary by Student–Teacher Dynamics: Evidence from a Real-world Classroom Electroencephalography Study. *Journal of Cognitive Neuroscience*,

31(3), 401–411.

Bevilacqua, D., Davidesco, I., Wan, L., Oostrik, M., Chaloner, K., Rowland, J., ... Dikker, S. (2018).

Brain-to-Brain Synchrony and Learning Outcomes Vary by Student--Teacher Dynamics: Evidence from a Real-world Classroom Electroencephalography Study. *Journal of Cognitive Neuroscience*, 1–11.

Bhattacharya, J. (2017). Cognitive Neuroscience: Synchronizing Brains in the Classroom. *Current*

*Biology*, Vol. 27, pp. R346–R348. <https://doi.org/10.1016/j.cub.2017.03.071>

Brunner, C., Birbaumer, N., Blankertz, B., Guger, C., Kübler, A., Mattia, D., ... Others. (2015). BNCI

Horizon 2020: towards a roadmap for the BCI community. *Brain-Computer Interfaces*, 2(1), 1–10.

Cohen, S. S., Henin, S., & Parra, L. C. (2017). Engaging narratives evoke similar neural activity and

lead to similar time perception. *Scientific Reports*, 7(1), 4578.

Cruz-Garza, J. G., Brantley, J. A., Nakagome, S., Kontson, K., Megjhani, M., Robleto, D., &

Contreras-Vidal, J. L. (2017). Deployment of Mobile EEG Technology in an Art Museum Setting: Evaluation of Signal Quality and Usability. *Frontiers in Human Neuroscience*, 11, 527.

Cui, X., Bryant, D. M., & Reiss, A. L. (2012). NIRS-based hyperscanning reveals increased

interpersonal coherence in superior frontal cortex during cooperation. *NeuroImage*, 59(3), 2430–2437.

Dalton, K. M., Nacewicz, B. M., Johnstone, T., Schaefer, H. S., Gernsbacher, M. A., Goldsmith, H. H.,

... Davidson, R. J. (2005). Gaze fixation and the neural circuitry of face processing in autism. *Nature Neuroscience*, 8(4), 519–526.

Davis, M. H., & Others. (1980). *A multidimensional approach to individual differences in empathy*.

Retrieved from [https://www.uv.es/friasnav/Davis\\_1980.pdf](https://www.uv.es/friasnav/Davis_1980.pdf)

Debener, S., Minow, F., Emkes, R., Gandras, K., & de Vos, M. (2012). How about taking a low-cost,

small, and wireless EEG for a walk?: EEG to go. *Psychophysiology*, 49(11), 1617–1621.

De Jaegher, H., Di Paolo, E., & Gallagher, S. (2010). Can social interaction constitute social cognition?

*Trends in Cognitive Sciences*, 14(10), 441–447.

Dikker, S., Montgomery, S., & Tunca, S. (2019). Using synchrony-based neurofeedback in search of human connectedness. In A. Nijholt (Ed.), *Brain Art: Brain-Computer Interfaces for Artistic Expression*.

Dikker, S., Silbert, L. J., Hasson, U., & Zevin, J. D. (2014). On the Same Wavelength: Predictable Language Enhances Speaker–Listener Brain-to-Brain Synchrony in Posterior Superior Temporal Gyrus. *The Journal of Neuroscience: The Official Journal of the Society for Neuroscience*, 34(18), 6267–6272.

Dikker, S., Wan, L., Davidesco, I., Kaggen, L., Oostrik, M., McClintock, J., ... Poeppel, D. (2017). Brain-to-Brain Synchrony Tracks Real-World Dynamic Group Interactions in the Classroom. *Current Biology: CB*, 27(9), 1375–1380.

Dikker, S., Wan, L., Davidesco, I., Kaggen, L., Oostrik, M., McClintock, J., ... Poeppel, D. (2017). Brain-to-Brain Synchrony Tracks Real-World Dynamic Group Interactions in the Classroom. *Current Biology: CB*, 27(9), 1375–1380.

Duffy, F. H., McAnulty, G. B., & Albert, M. S. (1993). The pattern of age-related differences in electrophysiological activity of healthy males and females. *Neurobiology of Aging*, 14(1), 73–84.

Dumas, G., Chavez, M., Nadel, J., & Martinerie, J. (2012). Anatomical connectivity influences both intra- and inter-brain synchronizations. *PloS One*, 7(5), e36414.

Dumas, G., Nadel, J., Soussignan, R., Martinerie, J., & Garnero, L. (2010). Inter-brain synchronization during social interaction. *PloS One*, 5(8), e12166.

Falk, E. B., Hyde, L. W., Mitchell, C., Faul, J., Gonzalez, R., Heitzeg, M. M., ... Schulenberg, J. (2013). What is a representative brain? Neuroscience meets population science. *Proceedings of the National Academy of Sciences of the United States of America*, 110(44), 17615–17622.

Goldstein, P., Weissman-Fogel, I., Dumas, G., & Shamay-Tsoory, S. G. (2018). Brain-to-brain coupling during handholding is associated with pain reduction. *Proceedings of the National Academy of*

*Sciences of the United States of America*, 115(11), E2528–E2537.

- Gwin, J. T., Gramann, K., & Makeig, S. (2010). Removal of movement artifact from high-density EEG recorded during walking and running. *Journal of*. Retrieved from <https://www.physiology.org/doi/abs/10.1152/jn.00105.2010>
- Hari, R. (2006). Action–perception connection and the cortical mu rhythm. In C. Neuper & W. Klimesch (Eds.), *Progress in Brain Research* (Vol. 159, pp. 253–260). Elsevier.
- Hasson, U., Ghazanfar, A. A., Galantucci, B., Garrod, S., & Keysers, C. (2012). Brain-to-brain coupling: a mechanism for creating and sharing a social world. *Trends in Cognitive Sciences*, 16(2), 114–121.
- Hasson, U., Nir, Y., Levy, I., Fuhrmann, G., & Malach, R. (2004). Intersubject synchronization of cortical activity during natural vision. *Science*, 303(5664), 1634–1640.
- Henrich, J., Heine, S. J., & Norenzayan, A. (2010). The weirdest people in the world? *The Behavioral and Brain Sciences*, 33(2-3), 61–83.
- Hipp, J. F., Hawellek, D. J., Corbetta, M., Siegel, M., & Engel, A. K. (2012). Large-scale cortical correlation structure of spontaneous oscillatory activity. *Nature Neuroscience*, 15(6), 884–890.
- Kang, O., & Wheatley, T. (2017). Pupil dilation patterns spontaneously synchronize across individuals during shared attention. *Journal of Experimental Psychology. General*, 146(4), 569–576.
- Ki, J. J., Kelly, S. P., & Parra, L. C. (2016). Attention Strongly Modulates Reliability of Neural Responses to Naturalistic Narrative Stimuli. *The Journal of Neuroscience: The Official Journal of the Society for Neuroscience*, 36(10), 3092–3101.
- Kinreich, S., Djalovski, A., Kraus, L., Louzoun, Y., & Feldman, R. (2017). Brain-to-Brain Synchrony during Naturalistic Social Interactions. *Scientific Reports*, 7(1), 17060.
- Koelewijn, T., van Schie, H. T., Bekkering, H., Oostenveld, R., & Jensen, O. (2008). Motor-cortical beta oscillations are modulated by correctness of observed action. *NeuroImage*, Vol. 40, pp. 767–775. <https://doi.org/10.1016/j.neuroimage.2007.12.018>

- Konvalinka, I., Bauer, M., Stahlhut, C., Hansen, L. K., Roepstorff, A., & Frith, C. D. (2014). Frontal alpha oscillations distinguish leaders from followers: multivariate decoding of mutually interacting brains. *NeuroImage*, 94, 79–88.
- Koole, S. L., & Tschacher, W. (2016). Synchrony in Psychotherapy: A Review and an Integrative Framework for the Therapeutic Alliance. *Frontiers in Psychology*, 7, 755.
- Krigolson, O. E., Williams, C. C., Norton, A., Hassall, C. D., & Colino, F. L. (2017). Choosing MUSE: Validation of a Low-Cost, Portable EEG System for ERP Research. *Frontiers in Neuroscience*, 11, 109.
- Kross, E., Verduyn, P., Demiralp, E., Park, J., Lee, D. S., Lin, N., ... Ybarra, O. (2013). Facebook use predicts declines in subjective well-being in young adults. *PloS One*, 8(8), e69841.
- Kylliäinen, A., Wallace, S., Coutanche, M. N., Leppänen, J. M., Cusack, J., Bailey, A. J., & Hietanen, J. K. (2012). Affective--motivational brain responses to direct gaze in children with autism spectrum disorder. *Journal of Child Psychology and Psychiatry, and Allied Disciplines*, 53(7), 790–797.
- Lee, T.-H., Miernicki, M. E., & Telzer, E. H. (2017). Families that fire together smile together: Resting state connectome similarity and daily emotional synchrony in parent-child dyads. *NeuroImage*, 152, 31–37.
- Leong, V., Byrne, E., & Clackson, K. (2017). Speaker gaze increases information coupling between infant and adult brains. *Proceedings of the National Academy of Sciences*.
- LeWinn, K. Z., Sheridan, M. A., Keyes, K. M., Hamilton, A., & McLaughlin, K. A. (2017). Sample composition alters associations between age and brain structure. *Nature Communications*, 8(1), 874.
- Liu, D., Liu, S., Liu, X., Zhang, C., Li, A., Jin, C., ... Zhang, X. (2018). Interactive Brain Activity: Review and Progress on EEG-Based Hyperscanning in Social Interactions. *Frontiers in Psychology*, 9, 1862.
- Lumsden, J., Miles, L. K., Richardson, M. J., Smith, C. A., & Macrae, C. N. (2012). Who syncs? Social

motives and interpersonal coordination. *Journal of Experimental Social Psychology*, 48(3), 746–751.

Marsh, K. L., Isenhower, R. W., Richardson, M. J., Helt, M., Verbalis, A. D., Schmidt, R. C., & Fein, D. (2013). Autism and social disconnection in interpersonal rocking. *Frontiers in Integrative Neuroscience*, 7, 4.

Matusz, P. J., Dikker, S., Huth, A. G., & Perrodin, C. (2019). Are We Ready for Real-world Neuroscience? *Journal of Cognitive Neuroscience*, 31(3), 327–338.

Minguillon, J., Lopez-Gordo, M. A., & Pelayo, F. (2017). Trends in EEG-BCI for daily-life: Requirements for artifact removal. *Biomedical Signal Processing and Control*, 31, 407–418.

Müller, V., & Lindenberger, U. (2011). Cardiac and respiratory patterns synchronize between persons during choir singing. *PloS One*, 6(9), e24893.

Nishitani, N., & Hari, R. (2000). Temporal dynamics of cortical representation for action. *Proceedings of the National Academy of Sciences of the United States of America*, 97(2), 913–918.

Nolte, G., Bai, O., Wheaton, L., Mari, Z., Vorbach, S., & Hallett, M. (2004). Identifying true brain interaction from EEG data using the imaginary part of coherency. *Clinical Neurophysiology: Official Journal of the International Federation of Clinical Neurophysiology*, 115(10), 2292–2307.

Novembre, G., Knoblich, G., Dunne, L., & Keller, P. E. (2017). Interpersonal synchrony enhanced through 20 Hz phase-coupled dual brain stimulation. *Social Cognitive and Affective Neuroscience*. <https://doi.org/10.1093/scan/nsw172>

Noy, L., Levit-Binun, N., & Golland, Y. (2015). Being in the zone: physiological markers of togetherness in joint improvisation. *Frontiers in Human Neuroscience*, 9, 187.

Nummenmaa, L., Glerean, E., Viinikainen, M., Jääskeläinen, I. P., Hari, R., & Sams, M. (2012). Emotions promote social interaction by synchronizing brain activity across individuals. *Proceedings of the National Academy of Sciences of the United States of America*, 109(24), 9599–9604.

Oostenveld, R., Fries, P., Maris, E., & Schoffelen, J.-M. (2011). FieldTrip: Open source software for

advanced analysis of MEG, EEG, and invasive electrophysiological data. *Computational Intelligence and Neuroscience*, 2011, 156869.

Parada, F. J., & Rossi, A. (2017). Commentary: Brain-to-Brain Synchrony Tracks Real-World Dynamic Group Interactions in the Classroom and Cognitive Neuroscience: Synchronizing Brains in the Classroom. *Frontiers in Human Neuroscience*, Vol. 11. <https://doi.org/10.3389/fnhum.2017.00554>

Parkinson, C., Kleinbaum, A. M., & Wheatley, T. (2018). Similar neural responses predict friendship. *Nature Communications*, 9(1), 332.

Pérez, A., Dumas, G., Karadag, M., & Duñabeitia, J. A. (2018). Differential brain-to-brain entrainment while speaking and listening in native and foreign languages. *Cortex; a Journal Devoted to the Study of the Nervous System and Behavior*. <https://doi.org/10.1016/j.cortex.2018.11.026>

Perry, A., Troje, N. F., & Bentin, S. (2010). Exploring motor system contributions to the perception of social information: Evidence from EEG activity in the mu/alpha frequency range. *Social Neuroscience*, 5(3), 272–284.

Petroni, A., Cohen, S. S., Ai, L., Langer, N., Henin, S., Vanderwal, T., ... Parra, L. C. (2017). Age and sex modulate the variability of neural responses to naturalistic videos (p. 089060). <https://doi.org/10.1101/089060>

Pfurtscheller, G., & Lopes da Silva, F. H. (1999). *Event-related desynchronization. Handbook of Electroencephalography and Clinical Neurophysiology, revised series (Vol. 6)*. Amsterdam: Elsevier.

Pickering, M. J., & Garrod, S. (2013). An integrated theory of language production and comprehension. *The Behavioral and Brain Sciences*, 36(4), 329–347.

Pineda, J. A. (2005). The functional significance of mu rhythms: Translating “seeing” and “hearing” into “doing.” *Brain Research Reviews*, 50(1), 57–68.

Ramseyer, F., & Tschacher, W. (2011). Nonverbal synchrony in psychotherapy: coordinated body movement reflects relationship quality and outcome. *Journal of Consulting and Clinical*



*Psychology*, 79(3), 284–295.

Richardson, D. C., Dale, R., & Tomlinson, J. M. (2009). Conversation, gaze coordination, and beliefs about visual context. *Cognitive Science*, 33(8), 1468–1482.

Richardson, M. J., Marsh, K. L., Isenhower, R. W., Goodman, J. R. L., & Schmidt, R. C. (2007). Rocking together: dynamics of intentional and unintentional interpersonal coordination. *Human Movement Science*, 26(6), 867–891.

Saarela, M. V., Hlushchuk, Y., Williams, A. C. de C., Schürmann, M., Kalso, E., & Hari, R. (2007). The compassionate brain: humans detect intensity of pain from another's face. *Cerebral Cortex*, 17(1), 230–237.

Sänger, J., Lindenberger, U., & Müller, V. (2011). Interactive brains, social minds. *Communicative & Integrative Biology*, 4(6), 655–663.

Sänger, J., Müller, V., & Lindenberger, U. (2012). Intra- and interbrain synchronization and network properties when playing guitar in duets. *Frontiers in Human Neuroscience*, 6, 312.

Scott-Van Zeeland, A. A., Dapretto, M., Ghahremani, D. G., Poldrack, R. A., & Bookheimer, S. Y. (2010). Reward processing in autism. *Autism Research: Official Journal of the International Society for Autism Research*, 3(2), 53–67.

Sebanz, N., Bekkering, H., & Knoblich, G. (2006). Joint action: bodies and minds moving together. *Trends in Cognitive Sciences*, 10(2), 70–76.

Shamay-Tsoory, S. G., & Mendelsohn, A. (2019). Real-Life Neuroscience: An Ecological Approach to Brain and Behavior Research. *Perspectives on Psychological Science: A Journal of the Association for Psychological Science*, 14(5), 841–859.

Spitzer, B., & Haegens, S. (2017). Beyond the Status Quo: A Role for Beta Oscillations in Endogenous Content (Re)Activation. *Eneuro*, Vol. 4, pp. ENEURO.0170–17.2017.  
<https://doi.org/10.1523/eneuro.0170-17.2017>

Stephens, G. J., Silbert, L. J., & Hasson, U. (2010). Speaker–listener neural coupling underlies



successful communication. *Proceedings of the National Academy of Sciences of the United States of America*, 107(32), 14425–14430.

Szymanski, C., Pesquita, A., Brennan, A. A., Perdakis, D., Enns, J. T., Brick, T. R., ... Lindenberg, U.

(2017). Teams on the same wavelength perform better: Inter-brain phase synchronization constitutes a neural substrate for social facilitation. *NeuroImage*, 152, 425–436.

Thorson, K. R., West, T. V., & Mendes, W. B. (2018). Measuring physiological influence in dyads: A guide to designing, implementing, and analyzing dyadic physiological studies. *Psychological Methods*, 23(4), 595–616.

Tomasello, M., & Others. (1995). Joint attention as social cognition. *Joint Attention: Its Origins and Role in Development*, 103130. Waters, S. F., West, T. V., Karnilowicz, H. R., & Mendes, W. B. (2017). Affect contagion between mothers and infants: Examining valence and touch. *Journal of Experimental Psychology. General*, 146(7), 1043–1051.

Watson, D., & Clark, L. A. (1994). The Panas-X. *Manual for the Positive and Negative Affect Schedule-Expanded Form*. The University of Iowa.

Yang, C.-Y., Decety, J., Lee, S., Chen, C., & Cheng, Y. (2009). Gender differences in the mu rhythm during empathy for pain: an electroencephalographic study. *Brain Research*, 1251, 176–184.
